# Supplementary material
Source: PubMed Central journal article supplement (PMC3448428)

## SUPPLEMENTARY DATA

FIG. S1. (A) Effect of neostigmine (+) on olive pollen capacity to germinate *in vitro* after 6 h of culture compared with a non-treated (-) control. The number of germinated grains decreased significantly after treatment with the inhibitor. (B) Effect of DIFP (+) on olive pollen tube growth rate *in vitro* compared with a non-treated (-) control. After 6 h of germination, the pollen tube length decreased four-fold in the presence of the inhibitor (arrowheads). Scale bars = 100  $\mu$ m.

A

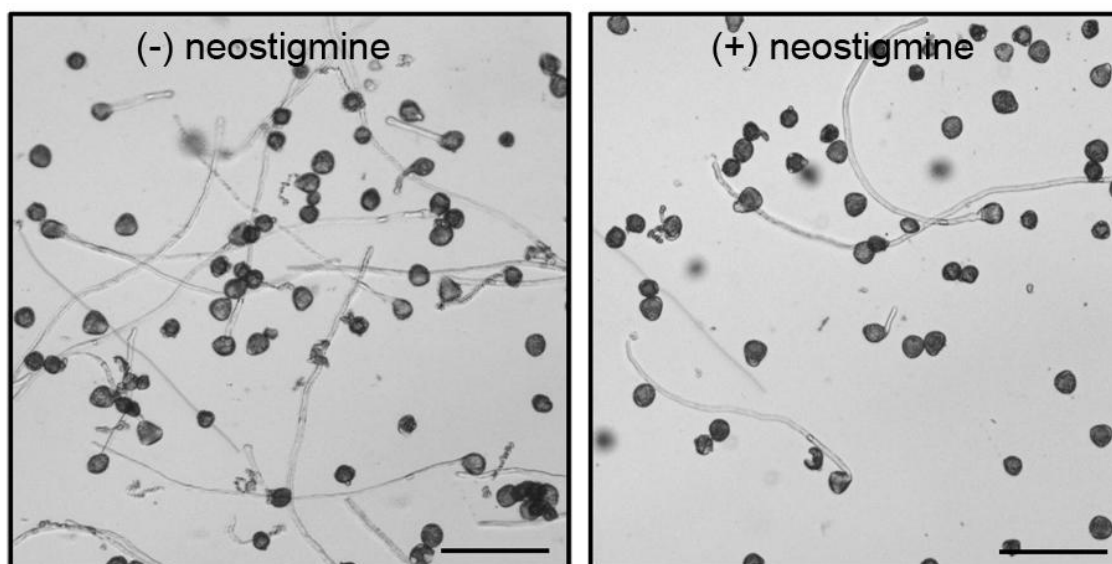

B

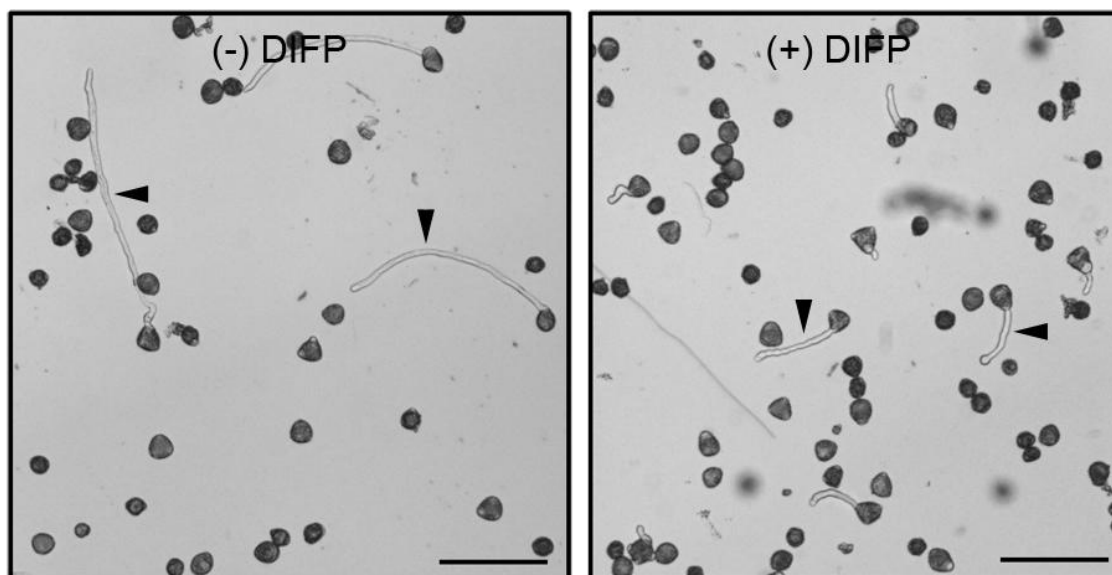

Supplement: supp_mcs174_mcs174supp.pdf [file supp_mcs174_mcs174supp.pdf]
